# Supplementary material
Source: Springer Nature journal article supplement (https://www.springermedizin.de/resource/supplementary/13075_2010_9756_MOESM3_ESM.pdf/9693338)

Multidisciplinary  
Pain Therapy

Exercise Therapy  
(both cLBP groups)

Psychotherapy  
(both cLBP groups, main impact for cLBP+DE)

TNF- $\alpha$ ↓, PCS↑

Improvement in depressive  
Symptoms and Pain

CES-D↓, VAS↓, MCS ↓,

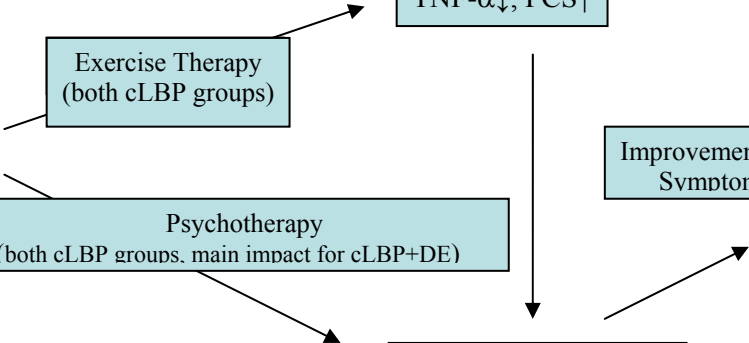

Supplement: MOESM3 [file 9693338]
